# Supplementary material
Source: publisher figshare collection journal article supplement (https://tandf.figshare.com/ndownloader/files/15134597)
Supplement: Supplementary file 1 [file 15134597]

Appendix A: Descriptive statistics for the PPEQ items in the pilot study

|  | Skewness | | Kurtosis | |  | Skewness | | Kurtosis | |
| --- | --- | --- | --- | --- | --- | --- | --- | --- | --- |
| Statistic | S.E. | Statistic | S.E. |  | Statistic | S.E. | Statistic | S.E. |
| ITEMA01 | -0.661 | .131 | -0.329 | .262 | ITEMC04 | -1.027 | .131 | 0.833 | .262 |
| ITEMA02 | -0.935 | .131 | 0.700 | .262 | ITEMC05 | -0.545 | .132 | -0.341 | .263 |
| ITEMA03 | -1.853 | .132 | 2.719 | .263 | ITEMC06 | -1.438 | .131 | 2.175 | .262 |
| ITEMA04 | -1.158 | .131 | 0.589 | .262 | ITEMD01 | -1.198 | .132 | 0.715 | .263 |
| ITEMA05 | -0.455 | .132 | -0.397 | .263 | ITEMD02 | 0.227 | .132 | -1.125 | .263 |
| ITEMA06 | -1.779 | .132 | 2.775 | .263 | ITEMD03 | 0.416 | .132 | -0.911 | .263 |
| ITEMA07 | -1.598 | .132 | 2.194 | .263 | ITEMD04 | -0.952 | .132 | 0.479 | .263 |
| ITEMA08 | -0.956 | .132 | 0.728 | .263 | ITEMD05 | -0.122 | .132 | -1.049 | .263 |
| ITEMA09 | -1.177 | .132 | 1.077 | .264 | ITEME01 | -1.315 | .132 | 1.019 | .263 |
| ITEMA10 | -0.590 | .132 | -0.782 | .263 | ITEME02 | -0.268 | .132 | -0.619 | .263 |
| ITEMB01 | -1.454 | .131 | 1.653 | .262 | ITEME03 | -0.775 | .132 | 0.050 | .263 |
| ITEMB02 | -0.908 | .131 | -0.015 | .262 | ITEME04 | -0.994 | .132 | 0.606 | .263 |
| ITEMB03 | -0.534 | .131 | -0.323 | .262 | ITEME05 | -1.287 | .132 | 1.554 | .263 |
| ITEMB04 | -0.130 | .131 | -0.778 | .262 | ITEME06 | -1.454 | .132 | 1.411 | .263 |
| ITEMB05 | -1.561 | .131 | 1.753 | .262 | ITEMF01 | -0.882 | .132 | 0.264 | .263 |
| ITEMB06 | -0.860 | .132 | 0.043 | .263 | ITEMF02 | -0.881 | .132 | 0.059 | .263 |
| ITEMB07 | -1.021 | .132 | 0.733 | .263 | ITEMF03 | 0.264 | .132 | -0.819 | .263 |
| ITEMB08 | -0.687 | .132 | -0.131 | .263 | ITEMF04 | -0.441 | .132 | -0.741 | .263 |
| ITEMC01 | -0.341 | .131 | -0.578 | .262 | ITEMF05 | -0.897 | .132 | 0.130 | .263 |
| ITEMC02 | -0.763 | .132 | -0.016 | .263 | ITEMF06 | -0.850 | .132 | 0.248 | .263 |
| ITEMC03 | -0.869 | .132 | 0.248 | .263 | ITEMF07 | -0.427 | .132 | -0.695 | .263 |

Appendix B: The item deletion and dimension revision in the PPEQ

| Item-Dimension Label | | | | Items | |
| --- | --- | --- | --- | --- | --- |
| Version 1 | | Version 2 | | Turkish Version | English Version* |
| STRUCTURE OF KNOWLEDGE | A03 | SK_1 FACTOR | A03 | Fizik dersinde bir konuyu anlayabilmem için konuyla ilgili temel kavramları anlamam gerekir. | To understand a subject in physics, I need to understand the basic concepts of the subject. |
| A04 | A04 | Fizik dersinde öğrendiğim bilgiler birbiriyle tutarlı (uyumlu) olmak zorunda değil. | The knowledge that I learned in the physics class does not have to be consistent. |
| A06 | A06 | Fizik dersinde karmaşık ya da üst düzey konuları anlayabilmem için temel kavramları anlamam gerekir. | I need to understand the basic concepts in order to understand complex or high-level subjects in physics. |
| A07 | A07 | Fizik dersinde bir konuyu anlayabilmem için önceden öğrendiğim bilgilere ihtiyacım yok. | To understand a topic in the physics course, I do not need the knowledge I have already learned. |
| A08 | A08 | Fizik dersinde yeni konuyla ilgili kavramları önceden öğrendiklerimle ilişkilendirerek anlamlı hale getiririm. | In the physics course, I make sense by associating the concepts related to the new subject with what I have already learned. |
| A01 | SK_2 FACTOR | A01 | Fizik dersindeki farklı konularda öğrendiğim bilgilerin birbirleriyle ilişkisini kurmam. | I do not relate the information I learned on different subjects in the physics course. |
| A02 | A02 | Fizik dersinde yeni bilgileri sahip olduğum bilgilerle ilişkilendirerek öğrenirim. | I learn new knowledge in physics by associating it with the knowledge I have. |
| A05 | A05 | Fizik dersinde bir konuyu önceden öğrendiğim bilgiler sayesinde anlarım. | I understand a subject in the physics lesson through the knowledge I have already learned. |
| A09 | A09 | Fizik dersinde verilen bilgilerle önceden öğrendiğim bilgiler uyumlu olmalıdır. | The information provided in the physics course should be compatible with the knowledge I learned beforehand. |
| A10 | Deleted | | Fizikteki bir konuyla ilgili sahip olduğum bilgiler arasında birbirleriyle çelişen bilgiler olabilir. | The knowledge I have about a subject in physics can be contradictory within itself. |
| JUSTIFICATION OF KNOWLEDGE | B01 | B01 | | Fizik dersinde verilen bilgiler benim doğru bildiklerime ters düşerse bu bilgilerin mantığını sorgularım. | If the information given in the physics course contradicts what I know as correct, I question the rationale of this information. |
| B02 | Deleted | | Fizik dersinde öğrendiğim bilgilerle günlük hayattaki tecrübelerim çelişirse sorgulamadan derste verilen bilgileri doğru kabul ederim. | If the information I learned in the physics course contradicts my daily life experience, I accept the information given in the course without question. |
| B03 | Deleted | | Fizik dersinde verilen bilgilerin mantığını kendi gözlemlerimle test ederim. | I test the validity of the information given in the physics course with my observations. |
| B04 | Deleted | | Fizik dersinde verilen bilgilerin mantığını yapabileceğim deneylerle test ederim. | I test the validity of the information given in physics with experiments that I can make. |
| B05 | B02 | | Fizik dersinde verilen bilgiler önceki bildiklerimle çelişirse, bu bilgilerin mantığını sorgulamam. | If the information given in the physics course contradicts my previous knowledge, I do not question the validity of this information. |
| B06 | B03 | | Fizik dersinde verilen bilgileri ancak üzerinde düşünürsem (sorgularsam) kendim için anlamlı hale getirebilirim. | The information given in the physics course can make sense to me only if I think about it. |
| B07 | B04 | | Fizik dersinde verilen bilgiler doğru olabilir ancak bu bilgilerin benim bilgilerimle uyumlu (tutarlı) olup olmadığını sorgularım. | The information given in the physics course may be correct, but I still question whether this information is consistent with my knowledge. |
| B08 | B05 | | Fizikteki bilgiler bilim insanları tarafından keşfedilmiş olabilir, ama bize verilen bu bilgileri ancak üzerinde düşünürsem (sorgularsam) kendi bilgim haline getirebilirim. | Scientists may have discovered the information in physics, but I can make this information about my knowledge only if I think about it. |

Appendix B: (continued) The item deletion and dimension revision in the PPEQ

| Item-Dimension Label | | | Items | |
| --- | --- | --- | --- | --- |
| Version 1 | | Version 2 | Turkish Version | English Version* |
| CHANGEABILITY OF KNOWLEDGE | C01 | Deleted | Fizik dersinde mantığını anladığım bilgilerimi ne olursa olsun değiştirmem. | I am not going to change my knowledge that makes sense to me in physics. |
| C02 | C01 | Fizik dersinde öğrendiğim bilgiler hiçbir zaman değişmeyecek fiziksel gerçeklerdir; bu yüzden kendi bilgilerim de değişmeyecektir. | The knowledge I learned in the physics course is never-changing facts; so my knowledge will not change either. |
| C03 | C02 | Fizik ile ilgili şu an doğru olarak öğrendiklerim (yakın ya da uzak) gelecekte çürütülebilir; bu yüzden gerekirse kendi fizik bilgilerimi değiştiririm. | What I have learned about physics right now can be refuted in the (near or far) future; so I change my physics information if necessary. |
| C04 | C03 | Mantıklı açıklamalarla desteklenen yeni bilgiler sunulursa önceki fizik bilgilerimi değiştiririm. | If new information is provided with reasonable explanations, I will change my previous physics knowledge. |
| C05 | C04 | Fizik dersinde doğru olarak öğrendiğim ve mantığını kavradığım bilgilerin sonradan değişeceğine inanmıyorum. | I do not believe that the knowledge I learned correctly and understood the rationale in the physics course will change later. |
| C06 | C05 | Öğrendiğim yeni bilgiler sayesinde sahip olduğum fizik bilgisi değişir ve gelişir. | Thanks to the new information I learned, my physics knowledge changes and develops. |
| EQUATIONS IN PHYSICS | D01 | Deleted | Fizik dersinde verilen formülleri bilmem konuyu anlamam için yeterlidir; bu yüzden konuyla ilgili başka bir şey öğrenmem gerekmez. | The formulas given in physics course are enough to understand the subject; so I don't need to learn anything else about the subject. |
| D02 | Deleted | Fizik dersinde verilen formülleri konuyu anlamak için değil sadece konu ile ilgili sayısal soruları çözebilmek için ezberlerim. | I do not memorise the formulas given in the physics course to understand the subject, but only to solve the numerical questions related to the subject. |
| D03 | Deleted | Fizik dersinde verilen formüller, sadece konuyla ilgili sayısal soru çözerken matematiksel işlem yapmamı sağlar. | The formulas that given in the physics course assist me to do mathematical calculations only when solving the numerical question on the subject. |
| D04 | Deleted | Fizik dersinde verilen formüller, konuyla ilgili kavramların arasındaki ilişkileri gösterir. | The formulas given in physics course show the relations between the concepts related to the subject. |
| D05 | Deleted | Fizik dersinde verilen formülleri ezberlemem gerekmez, çünkü kavramlar arasındaki ilişkileri bildiğim zaman formülleri kendim bulabilirim. | I do not have to memorise the formulas given in the physics course, because when I know the relationships between concepts, I can find the related formulas. |
| SOURCE OF KNOWLEDGE | F01 | D01 | Fizik öğretmenimin anlattıklarını sorgulamadan kabul ederim. | I accept what my physics teacher says in the class without question. |
| F02 | D02 | Fizik dersinde öğrendiğim bilgiler bilim insanları tarafından kabul edilmiş gerçeklerdir, bu bilgileri sorgulamam gerekmez. | The information I have learned in the physics class are the facts accepted by scientists; I do not need to question this information. |
| F03 | Deleted | Fiziği anlamamın sebebi fizik bilgisini doğrudan anlatan bir öğretmene sahip olmamdır. | The reason I understand physics is that I have a teacher who explains physics knowledge directly. |
| F04 | Deleted | Fiziği anlamamın sebebi fizik bilgisini doğrudan anlatan bir ders kitabına sahip olmamdır. | The reason I understand physics is that I have a textbook that explains physics directly. |
| F05 | D03 | Fizik dersinde bir konuyla ilgili öğretmenimin verdiği bilgileri sorgulamama gerek yok. | I do not have to question the information my teacher provides about a subject in the physics course. |
| F06 | D04 | Fizik dersinde öğretmenimin verdiği bilgilerin mantığı üzerinde düşünürüm ve tartışırım. | I think and discuss the rationale of the information given by my teacher in the physics course. |
| F07 | Deleted | Derste kullandığımız fizik kitabımızdaki bilgilerin mantığı üzerinde düşünürüm ve tartışma ihtiyacı hissederim. | I feel the need to think and discuss the rationale of the information provided in our physics book. |

Appendix B: (continued) The item deletion and dimension revision in the PPEQ

| Item-Dimension Label | | | Items | |
| --- | --- | --- | --- | --- |
| Version 1 | | Version 2 | Turkish Version | English Version* |
| QUICK LEARNING | E01 | E01 | Yeterince zaman ayırıp çalıştığımda fizik dersinde verilen bilgilerin mantığını anlayabilirim. | If I spare enough time to study, I can understand the rationale of the knowledge given in physics class. |
| E02 | Deleted | Fizik dersinde bir konunun mantığını anlamam için çok fazla düşünmem gerekmez, çünkü anlatılanları ilk seferde (hemen) anlarım. | In the physics course, I do not have to think too much to understand the rationale of a subject, because I can understand it in the first time. |
| E03 | E02 | Fizikte anlayamadığım bir konu üzerinde tekrar tekrar düşünsem de konunun mantığını anlayamam. | If I could not understand a subject in physics at first, I cannot understand it even if I think about it over and over again. |
| E04 | E03 | Fizik dersinde ilk seferde anlayamadığım bir konunun mantığını anlamak için çaba sarf ederim. | I make an effort to understand a subject that I cannot understand at the first time in physics. |
| E05 | Deleted | Fizikteki bazı konuları anlayabilmem için çaba sarf etmem gerekir. | I have to make an effort to understand some subjects in physics. |
| E06 | E04 | Fizik dersinde verilen bilgileri ilk seferde anlamayabilirim, bu fiziği anlamayacağım anlamına gelmez. | I may not understand the information given in the physics course at the first time; this does not mean I cannot understand physics. |

* The adaptation process of the ‘English Version’ was not completed. These are just the direct translations of the items provided to help readers make sense of the items.

Appendix C: SPSS Output of item communalities

| Communalities | | |
| --- | --- | --- |
| Item | Initial | Extraction |
| ITEMA01SK | 1.000 | .565 |
| ITEMA02SK | 1.000 | .576 |
| ITEMA03SK | 1.000 | .635 |
| ITEMA04SK | 1.000 | .570 |
| ITEMA05SK | 1.000 | .594 |
| ITEMA06SK | 1.000 | .686 |
| ITEMA07SK | 1.000 | .602 |
| ITEMA08SK | 1.000 | .597 |
| ITEMA09SK | 1.000 | .597 |
| ITEMB01JK | 1.000 | .594 |
| ITEMB05JK | 1.000 | .576 |
| ITEMB06JK | 1.000 | .547 |
| ITEMB07JK | 1.000 | .660 |
| ITEMB08JK | 1.000 | .638 |
| ITEMC02CK | 1.000 | .554 |
| ITEMC03CK | 1.000 | .616 |
| ITEMC04CK | 1.000 | .561 |
| ITEMC05CK | 1.000 | .504 |
| ITEMC06CK | 1.000 | .586 |
| ITEME01QL | 1.000 | .662 |
| ITEME03QL | 1.000 | .508 |
| ITEME04QL | 1.000 | .506 |
| ITEME06QL | 1.000 | .633 |
| ITEMF01Source | 1.000 | .719 |
| ITEMF02Source | 1.000 | .733 |
| ITEMF05Source | 1.000 | .708 |
| ITEMF06Source | 1.000 | .552 |

Extraction Method: Principal Component Analysis.

Appendix D: AMOS output for hypothesized six-factor CFA model: Regression weights

|  |  |  | Estimate | S.E. | C.R. | P |
| --- | --- | --- | --- | --- | --- | --- |
| JK | <--- | PPE | 1.000 |  |  |  |
| QL | <--- | PPE | .950 | .099 | 9.549 | * |
| SKH | <--- | PPE | .909 | .086 | 10.522 | * |
| Source | <--- | PPE | .843 | .089 | 9.449 | * |
| SKC | <--- | PPE | .834 | .090 | 9.276 | * |
| CK | <--- | PPE | .822 | .084 | 9.757 | * |
| ITEMB02 | <--- | JK | 1.000 |  |  |  |
| ITEMB01 | <--- | JK | .964 | .081 | 11.954 | * |
| ITEMB03 | <--- | JK | .878 | .094 | 9.307 | * |
| ITEMB04 | <--- | JK | .841 | .079 | 10.685 | * |
| ITEMB05 | <--- | JK | .767 | .083 | 9.193 | * |
| ITEMD04 | <--- | Source | 1.000 |  |  |  |
| ITEMD02 | <--- | Source | .997 | .108 | 9.244 | * |
| ITEMD03 | <--- | Source | .944 | .095 | 9.885 | * |
| ITEMD01 | <--- | Source | .768 | .098 | 7.844 | * |
| ITEMC05 | <--- | CK | 1.000 |  |  |  |
| ITEMC03 | <--- | CK | .920 | .097 | 9.534 | * |
| ITEMC02 | <--- | CK | .892 | .099 | 8.990 | * |
| ITEMC01 | <--- | CK | .659 | .108 | 6.089 | * |
| ITEMC04 | <--- | CK | .619 | .108 | 5.756 | * |
| ITEME01 | <--- | QL | 1.000 |  |  |  |
| ITEME02 | <--- | QL | .821 | .091 | 9.073 | * |
| ITEME03 | <--- | QL | .880 | .095 | 9.220 | * |
| ITEME04 | <--- | QL | .866 | .091 | 9.551 | * |
| ITEMA07 | <--- | SKC | 1.000 |  |  |  |
| ITEMA03 | <--- | SKC | .980 | .108 | 9.089 | * |
| ITEMA06 | <--- | SKC | .936 | .097 | 9.609 | * |
| ITEMA04 | <--- | SKC | .914 | .104 | 8.745 | * |
| ITEMA09 | <--- | SKC | .885 | .100 | 8.885 | * |
| ITEMA08 | <--- | SKH | 1.000 |  |  |  |
| ITEMA02 | <--- | SKH | .871 | .080 | 10.918 | * |
| ITEMA05 | <--- | SKH | .660 | .091 | 7.283 | * |
| ITEMA01 | <--- | SKH | .560 | .099 | 5.686 | * |

*probability < .00

Appendix E: AMOS output for standardized regression weights

| Standardized Regression Weights | | | |
| --- | --- | --- | --- |
| ITEMB01 | <--- | JK | .643 |
| ITEMB02 | <--- | JK | .657 |
| ITEMB03 | <--- | JK | .574 |
| ITEMB04 | <--- | JK | .591 |
| ITEMB05 | <--- | JK | .510 |
| ITEMD01 | <--- | Source | .432 |
| ITEMD02 | <--- | Source | .535 |
| ITEMD03 | <--- | Source | .520 |
| ITEMD04 | <--- | Source | .584 |
| ITEMC01 | <--- | CK | .348 |
| ITEMC02 | <--- | CK | .493 |
| ITEMC03 | <--- | CK | .525 |
| ITEMC04 | <--- | CK | .324 |
| ITEMC05 | <--- | CK | .606 |
| ITEME01 | <--- | QL | .594 |
| ITEME02 | <--- | QL | .504 |
| ITEME03 | <--- | QL | .589 |
| ITEME04 | <--- | QL | .526 |
| ITEMA03 | <--- | SKC | .536 |
| ITEMA04 | <--- | SKC | .485 |
| ITEMA06 | <--- | SKC | .545 |
| ITEMA07 | <--- | SKC | .573 |
| ITEMA09 | <--- | SKC | .532 |
| ITEMA01 | <--- | SKH | .318 |
| ITEMA02 | <--- | SKH | .590 |
| ITEMA05 | <--- | SKH | .401 |
| ITEMA08 | <--- | SKH | .664 |

Appendix F: The criterion for fit indices and values obtained from the new model of the PPEQ

| Fit Index | Criterion | Value |
| --- | --- | --- |
| Chi-Square (χ²) | Non-significant | Significant |
| Chi-Square (χ²)/ Degrees of Freedom (df)  (CMIN/df) | Ratio of χ² to df <2 | =1.694 |
| Root Mean Square Residual (RMR) | <.050 | =.049 |
| Standardized Root Mean Square Residual  (S-RMR) | <.050 | =.0435 |
| Root Mean Square Error of Approximation (RMSEA) | <.050 | =.045 |
| Parsimony Goodness of Fit Index (PGFI) | higher the better | =.681 |
| Parsimony Normed Fit Index (PNFI) | higher the better | =.711 |
| Normed Fit Index (NFI) | >.90 | =.883 |
| Non-normed Fit Index (NNFI) | >.90 | =.935 |
| Comparative Fit Index (CFI) | >.90 | =.947 |
| Incremental Fit Index (IFI) | >.90 | =.948 |
| Relative Fit Index (RFI) | >.90 | =.854 |
| Tucker-Lewis Index (TLI) | >.90 | =.935 |
| Goodness-of-Fit Index (GFI) | close to 1.0 | =.912 |
| Adjusted Goodness of Fit Index (AGFI) | close to 1.0 | =.882 |
